# Supplementary material for: Early Deficits in Dentate Circuit and Behavioral Pattern Separation after Concussive Brain Injury
Source: PubMed Central journal article supplement — bioRxiv. 2023 Sep 17:2023.06.22.546120. Preprint. [Version 2] doi: 10.1101/2023.06.22.546120 (PMC10515770; doi:10.1101/2023.06.22.546120), 2023-09-17
Supplement: media-1.pdf [file media-1.pdf]

## Corrubia Supplementary Materials

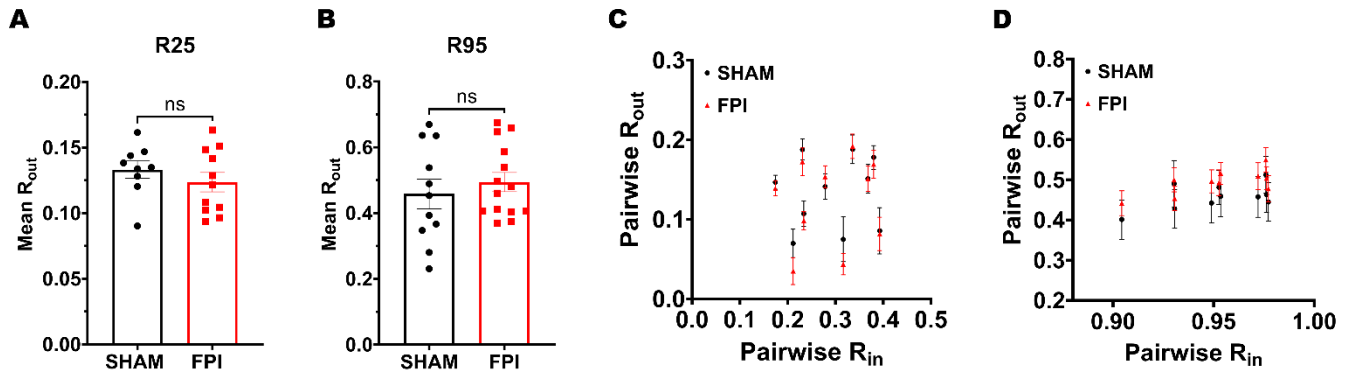

**Supplementary Figure 1. Decrease in GC decorrelation of highly similar temporal input patterns after brain injury.** (A-B) Summary plots of average  $R_{out}$  in each cell averaged across all  $R_{in}$  values centered around  $R=25$  (A) and  $R=95$  (B). (C-D) Pairwise  $R_{out}/R_{in}$  in GCs from sham and FPI mice for 10 distinct  $R_{in}$  values each centered around  $R=0.25$  (C) and  $R=95$  (D). Note that these are the same data as in Fig 5C presented at a different scale.
